# Supplementary material for: B Lymphocytes and Macrophages in the Perivascular Adipose Tissue Are Associated With Coronary Atherosclerosis: An Autopsy Study
Source: PubMed Central journal article supplement — J Am Heart Assoc. 2019 Dec 10;8(24):e013793. doi: 10.1161/JAHA.119.013793 (PMC6951066; doi:10.1161/jaha.119.013793), 2019-12-10
Supplement: JAH3-8-e013793-s001.pdf [file JAH3-8-e013793-s001.pdf]

# **SUPPLEMENTAL MATERIAL**

**Table S1. Descriptive analysis of coronary artery atherosclerosis and immune cells in the perivascular adipose tissue.**

| <b>Variables</b>                                                              | <b>Mean (SD) or n (%)</b> |
|-------------------------------------------------------------------------------|---------------------------|
| <b>Proximal fragment</b>                                                      |                           |
| . Percentage of arterial obstruction                                          | 56.7 (26.0)               |
| . Unstable Atherosclerotic plaques                                            | 41 (16.7%)                |
| . Density of macrophages ( $10^{-5}$ cells/ $\mu\text{m}^2$ ), median (IQR)   | 2.44 (1.31; 4.33)         |
| . Density of T-lymphocytes ( $10^{-5}$ cells/ $\mu\text{m}^2$ ), median (IQR) | 0.619 (0.301; 1.07)       |
| . Density of B-lymphocytes ( $10^{-5}$ cells/ $\mu\text{m}^2$ ), median (IQR) | 0.02 (0; 0.07)            |
| <b>Distal fragment</b>                                                        |                           |
| . Percentage of arterial obstruction                                          | 17.3 (10.3)               |
| . Unstable Atherosclerotic plaques                                            | 0 (0%)                    |
| . Density of macrophages ( $10^{-5}$ cells/ $\mu\text{m}^2$ ), median (IQR)   | 2.34 (0.99; 4.39)         |
| . Density of T-lymphocytes ( $10^{-5}$ cells/ $\mu\text{m}^2$ ), median (IQR) | 0.601 (0.380.4; 1.12)     |
| . Density of B-lymphocytes ( $10^{-5}$ cells/ $\mu\text{m}^2$ ), median (IQR) | 0.02 (0; 0.05)            |
| <b>Difference proximal and distal fragment</b>                                |                           |
| . Density of macrophages ( $10^{-5}$ cells/ $\mu\text{m}^2$ ), median (IQR)   | 0.07 (-1.08; 1.10)        |
| . Density of T-lymphocytes ( $10^{-5}$ cells/ $\mu\text{m}^2$ ), median (IQR) | -0.03 (-0.35; 0.40)       |
| . Density of B-lymphocytes ( $10^{-5}$ cells/ $\mu\text{m}^2$ ), median (IQR) | 0 (-0.02; 0.03)           |

**Table S2. Association of density of CD68<sup>+</sup> macrophages in the PvAT with sociodemographic and clinical data (n=246).**

| <b>Density of CD68<sup>+</sup> macrophages<br/>(10<sup>-5</sup> cells/μm<sup>2</sup>)</b> | <b>β</b> | <b>95% CI</b>  | <b>p<sup>†</sup></b> |
|-------------------------------------------------------------------------------------------|----------|----------------|----------------------|
| <b>Age (years), mean (SD)</b>                                                             | 0.052    | 0.017; 0.088   | 0.004                |
| <b>Female, n (%)</b>                                                                      | 0.492    | -0.581; 1.564  | 0.36                 |
| <b>White, n (%)</b>                                                                       | 0.240    | -0.868; 1.349  | 0.66                 |
| <b>Education (years), median (IQR)</b>                                                    | -0.072   | -0.194; 0.049  | 0.23                 |
| <b>Hypertension, n (%)</b>                                                                | -0.578   | -1.954; 0.796  | 0.40                 |
| <b>Diabetes, n (%)</b>                                                                    | -0.389   | -1.428; 0.649  | 0.45                 |
| <b>CAD symptoms, n (%)</b>                                                                | -0.461   | -1.891; 0.968  | 0.52                 |
| <b>Cardiac failure, n (%)</b>                                                             | -0.298   | -1.341; 0.746  | 0.57                 |
| <b>Stroke, n (%)</b>                                                                      | 0.271    | -1.029; 1.571  | 0.67                 |
| <b>Dyslipidemia, n (%)</b>                                                                | -0.286   | -1.622; 1.051  | 0.67                 |
| <b>BMI, mean (SD)</b>                                                                     | -0.140   | -0.254; -0.027 | 0.01                 |
| <b>Physical inactivity, n (%)</b>                                                         | 0.524    | -0.627; 1.675  | 0.36                 |
| <b>Current smoking, n (%)</b>                                                             | 0.951    | -1.017; 2.920  | 0.33                 |
| <b>Current alcohol use, n (%)</b>                                                         | -0.414   | -1.542; 0.714  | 0.46                 |

<sup>†</sup>Linear regression with robust standard errors to account for repeated measures in the same individual

**Table S3. Association of density of CD3<sup>+</sup> T-lymphocytes in the PvAT with sociodemographic and clinical data (n=246).**

| <b>Density of CD3<sup>+</sup> T-lymphocytes<br/>(10<sup>-5</sup> cells/<math>\mu</math>m<sup>2</sup>)</b> | <b><math>\beta</math></b> | <b>95% CI</b> | <b>p<sup>†</sup></b> |
|-----------------------------------------------------------------------------------------------------------|---------------------------|---------------|----------------------|
| <b>Age (years), mean (SD)</b>                                                                             | 0.004                     | -0.004; 0.013 | 0.30                 |
| <b>Female, n (%)</b>                                                                                      | 0.004                     | -0.281; 0.289 | 0.97                 |
| <b>White, n (%)</b>                                                                                       | -0.156                    | -0.459; 0.147 | 0.30                 |
| <b>Education (years), median (IQR)</b>                                                                    | -0.025                    | -0.059; 0.007 | 0.12                 |
| <b>Hypertension, n (%)</b>                                                                                | -0.162                    | -0.569; 0.245 | 0.43                 |
| <b>Diabetes, n (%)</b>                                                                                    | -0.034                    | -0.324; 0.255 | 0.81                 |
| <b>CAD symptoms, n (%)</b>                                                                                | 0.029                     | -0.300; 0.359 | 0.86                 |
| <b>Cardiac failure, n (%)</b>                                                                             | 0.078                     | -0.285; 0.441 | 0.67                 |
| <b>Stroke, n (%)</b>                                                                                      | 0.488                     | -0.155; 1.131 | 0.13                 |
| <b>Dyslipidemia, n (%)</b>                                                                                | -0.200                    | -0.455; 0.054 | 0.12                 |
| <b>BMI, mean (SD)</b>                                                                                     | -0.014                    | -0.034; .008  | 0.22                 |
| <b>Physical inactivity, n (%)</b>                                                                         | 0.246                     | 0.0007; 0.492 | 0.049                |
| <b>Current smoking, n (%)</b>                                                                             | 0.212                     | -0.208; 0.632 | 0.31                 |
| <b>Current alcohol use, n (%)</b>                                                                         | -0.054                    | -0.312; 0.203 | 0.67                 |

<sup>†</sup>Linear regression with robust standard errors to account for repeated measures in the same individual

**Table S4. Association of density of CD20<sup>+</sup> B-lymphocytes in the PvAT with sociodemographic and clinical data (n=246).**

| <b>Density of CD20<sup>+</sup> B-lymphocytes<br/>(10<sup>-5</sup> cells/<math>\mu</math>m<sup>2</sup>)</b> | <b><math>\beta</math></b> | <b>95% CI</b>  | <b>p<sup>†</sup></b> |
|------------------------------------------------------------------------------------------------------------|---------------------------|----------------|----------------------|
| <b>Age (years), mean (SD)</b>                                                                              | 0.0004                    | -0.0005; 0.001 | 0.35                 |
| <b>Female, n (%)</b>                                                                                       | 0.005                     | -0.021; 0.031  | 0.69                 |
| <b>White, n (%)</b>                                                                                        | -0.020                    | -0.047; 0.007  | 0.20                 |
| <b>Education (years), median (IQR)</b>                                                                     | 0.002                     | -0.001; 0.005  | 0.20                 |
| <b>Hypertension, n (%)</b>                                                                                 | 0.013                     | -0.018; 0.045  | 0.40                 |
| <b>Diabetes, n (%)</b>                                                                                     | -0.019                    | -0.044; 0.005  | 0.11                 |
| <b>CAD symptoms, n (%)</b>                                                                                 | -0.017                    | -0.059; 0.025  | 0.43                 |
| <b>Cardiac failure, n (%)</b>                                                                              | -0.013                    | -0.035; 0.009  | 0.23                 |
| <b>Stroke, n (%)</b>                                                                                       | -0.010                    | -0.033; 0.013  | 0.40                 |
| <b>Dyslipidemia, n (%)</b>                                                                                 | 0.018                     | -0.017; 0.052  | 0.31                 |
| <b>BMI, mean (SD)</b>                                                                                      | -0.002                    | -0.004; 0.0002 | 0.07                 |
| <b>Physical inactivity, n (%)</b>                                                                          | 0.012                     | -0.017; 0.040  | 0.41                 |
| <b>Current smoking, n (%)</b>                                                                              | 0.036                     | -0.012; 0.084  | 0.13                 |
| <b>Current alcohol use, n (%)</b>                                                                          | 0.014                     | -0.015; 0.045  | 0.33                 |

<sup>†</sup>Linear regression with robust standard errors to account for repeated measures in the same individual

**Table S5 Comparison of immune cells between perivascular adipose tissue of unstable atherosclerosis and perivascular adipose tissue of stable atherosclerosis in the same individual (n=26 matched pairs).**

| <b>The density of immune cells (<math>10^{-5}</math> cells/<math>\mu\text{m}^2</math>)</b> | <b>Perivascular adipose tissue of unstable atherosclerosis</b> | <b>Perivascular adipose tissue of stable atherosclerosis</b> | <b>p<sup>¤</sup></b> |
|--------------------------------------------------------------------------------------------|----------------------------------------------------------------|--------------------------------------------------------------|----------------------|
| . <i>CD68<sup>+</sup> macrophages</i>                                                      | 2.94 (1.93; 6.85)                                              | 3.09 (0.97; 4.33)                                            | 0.008                |
| . <i>CD3<sup>+</sup> T-lymphocytes</i>                                                     | 0.70 (0.28; 1.29)                                              | 0.54 (0.42; 1.11)                                            | 0.19                 |
| . <i>CD20<sup>+</sup> T-lymphocytes</i>                                                    | 0.07 (0.02; 0.01)                                              | 0.035 (0.02; 0.07)                                           | 0.58                 |

<sup>¤</sup> Wilcoxon matched pairs signed rank test

**Figure S1. Signs of sepsis detected during the anatomopathological post-mortem exam.**

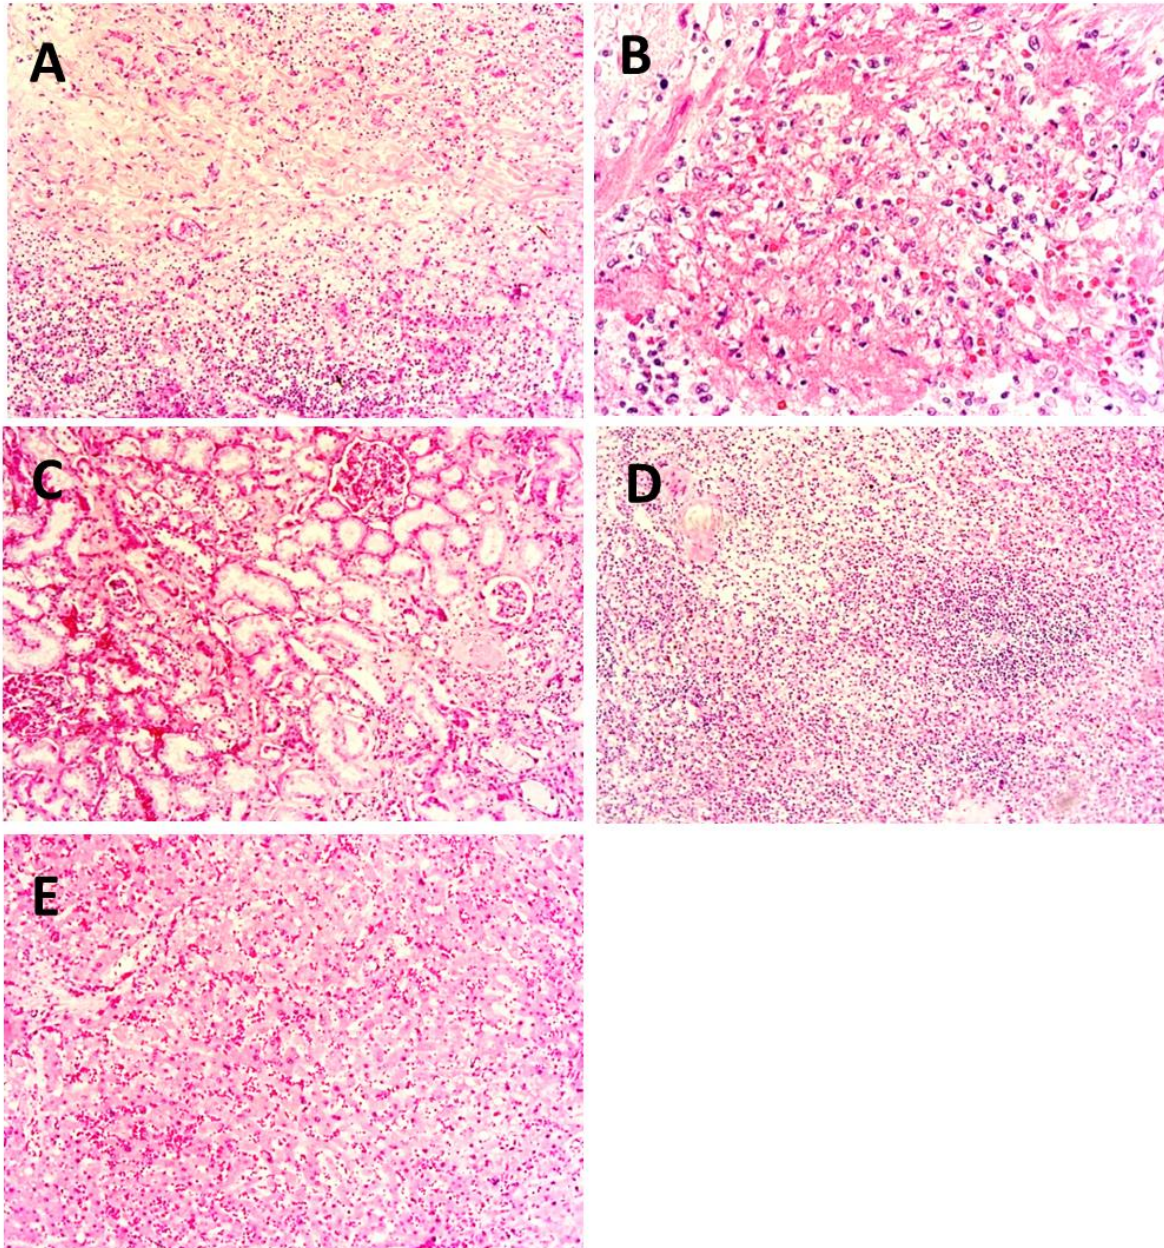

A: microscopic photograph (10x magnification) of lung with neutrophil infiltration due to bronchopneumonia. B: microscopic photograph (40x magnification) of neutrophil infiltrate in the lung. C: microscopic photograph (40x magnification) acute tubular necrosis responsive to shock in the kidney; D: microscopic photograph (10x magnification) of acute splenitis; E: microscopic photograph (10x magnification) of hepatic congestion and steatosis secondary to bronchopneumonia.



**Figure S2. Coronary artery with intraplaque hemorrhage.**

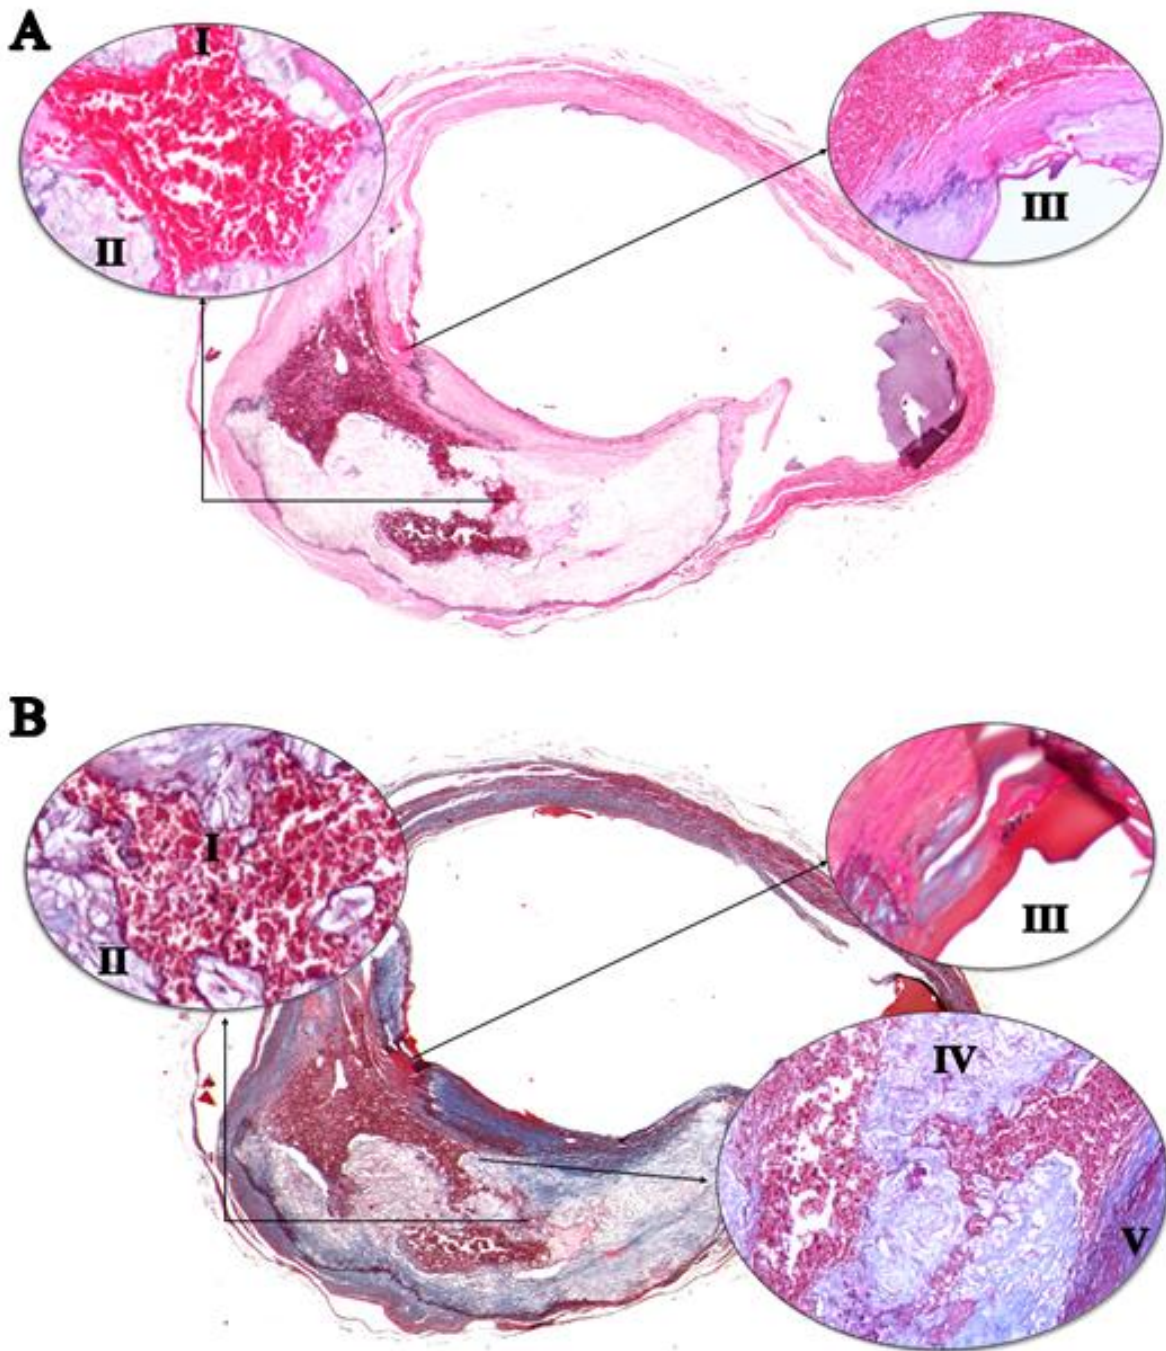

A. Coronary artery fragment stained with haematoxylin-eosin (2x of magnification). I: erythrocytes (40x of magnification); II: lipid core (40x of magnification); III: narrowing of the fibrous cap adjacent to the intraplaque hemorrhage (40x of magnification). B. Coronary artery fragment stained with Masson's trichrome (2x of magnification). I: erythrocytes (40x of magnification); II: lipid core (40x of magnification); III: narrowing of fibrous cap adjacent to intraplaque hemorrhage (40x of magnification); IV: lipid core and intraplaque hemorrhage (10x of magnification) and V: fibroses (10x of magnification).



**Figure S3. Coronary artery with thrombus.**

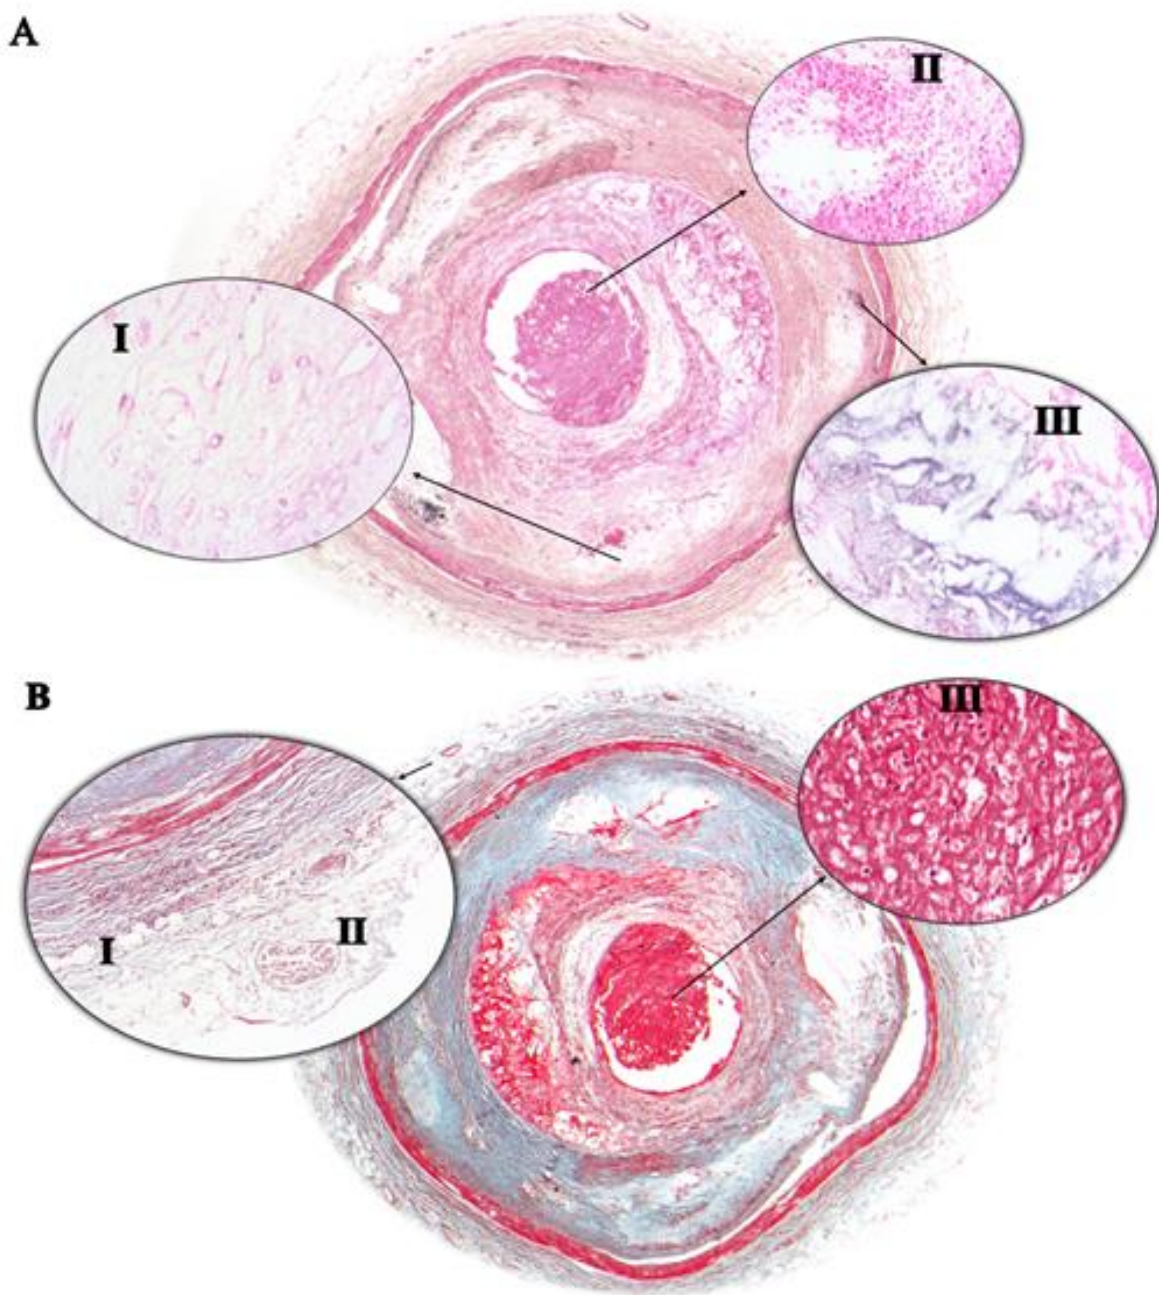

A. Coronary artery fragment stained with haematoxylin-eosin (2x of magnification). I: lipid core (40x of magnification); II: erythrocytes inside the thrombus (40x of magnification); III: calcification (40x of magnification). B. Coronary artery fragment stained with Masson's trichrome (2x of magnification). I: Periplaque perivascular adipose tissue near the adventitia layer (10x of magnification); II: *vasa vasorum* (10x of magnification); III: thrombus (40x of magnification).

**Figure S4. Flowchart of study participants.**

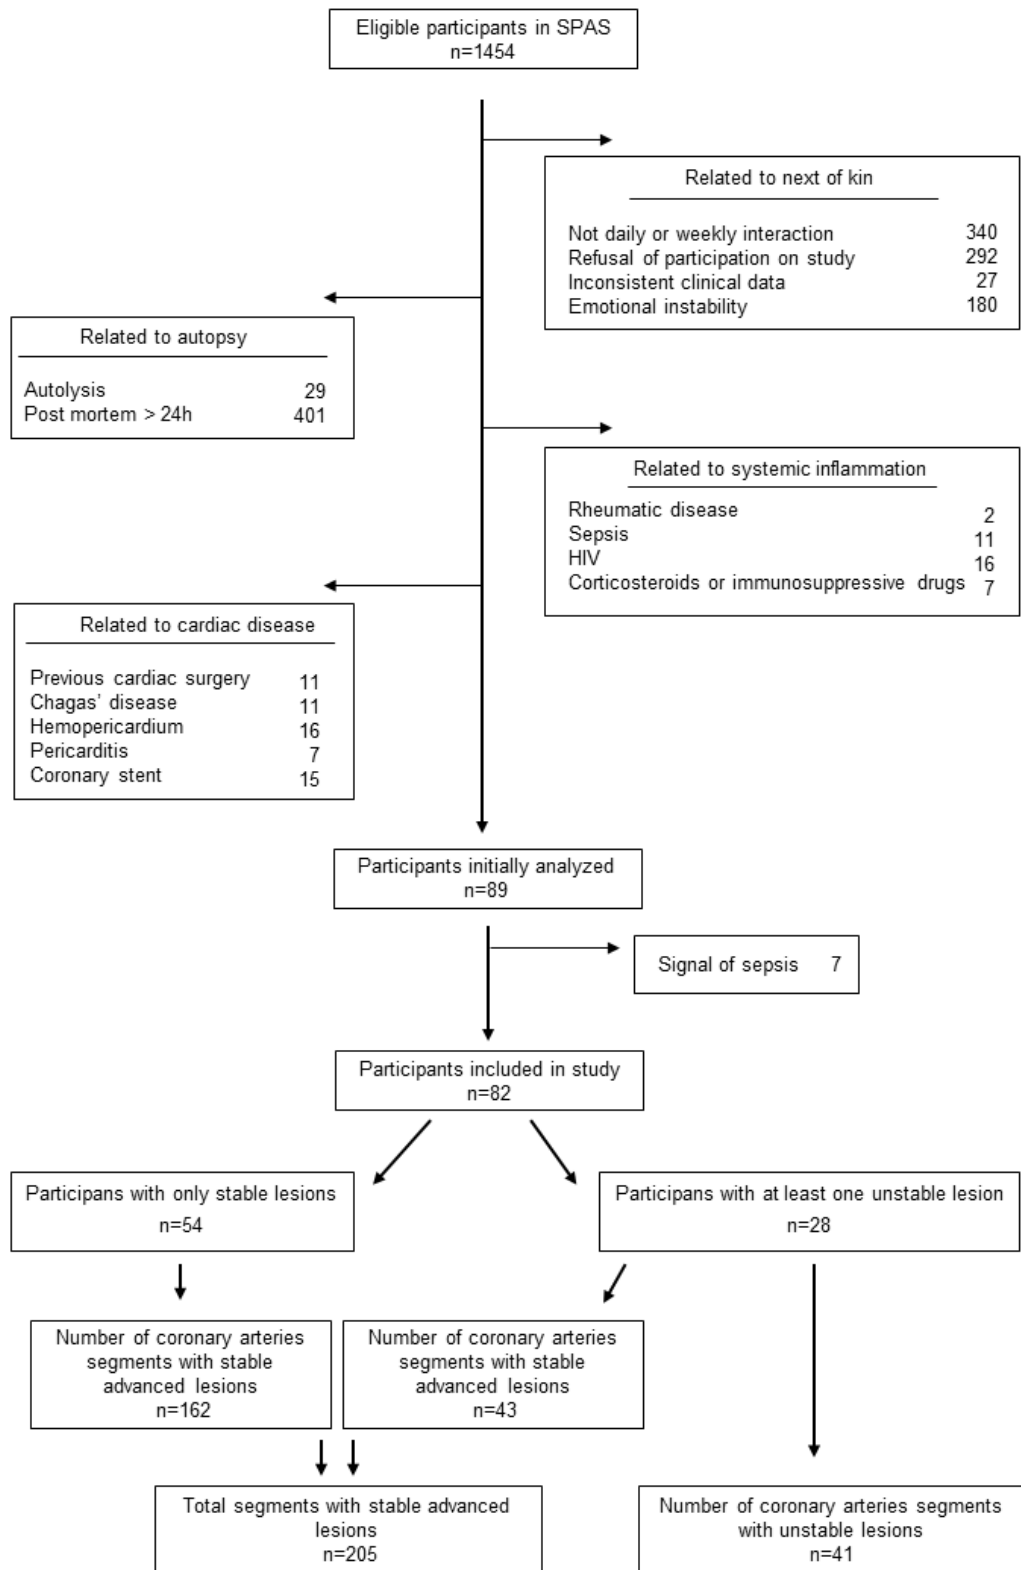

SPAS: São Paulo Autopsy Service. HIV: Human Immunodeficiency Virus.

**Figure S5. Association between CD3<sup>+</sup> T-lymphocytes and atherosclerosis.**

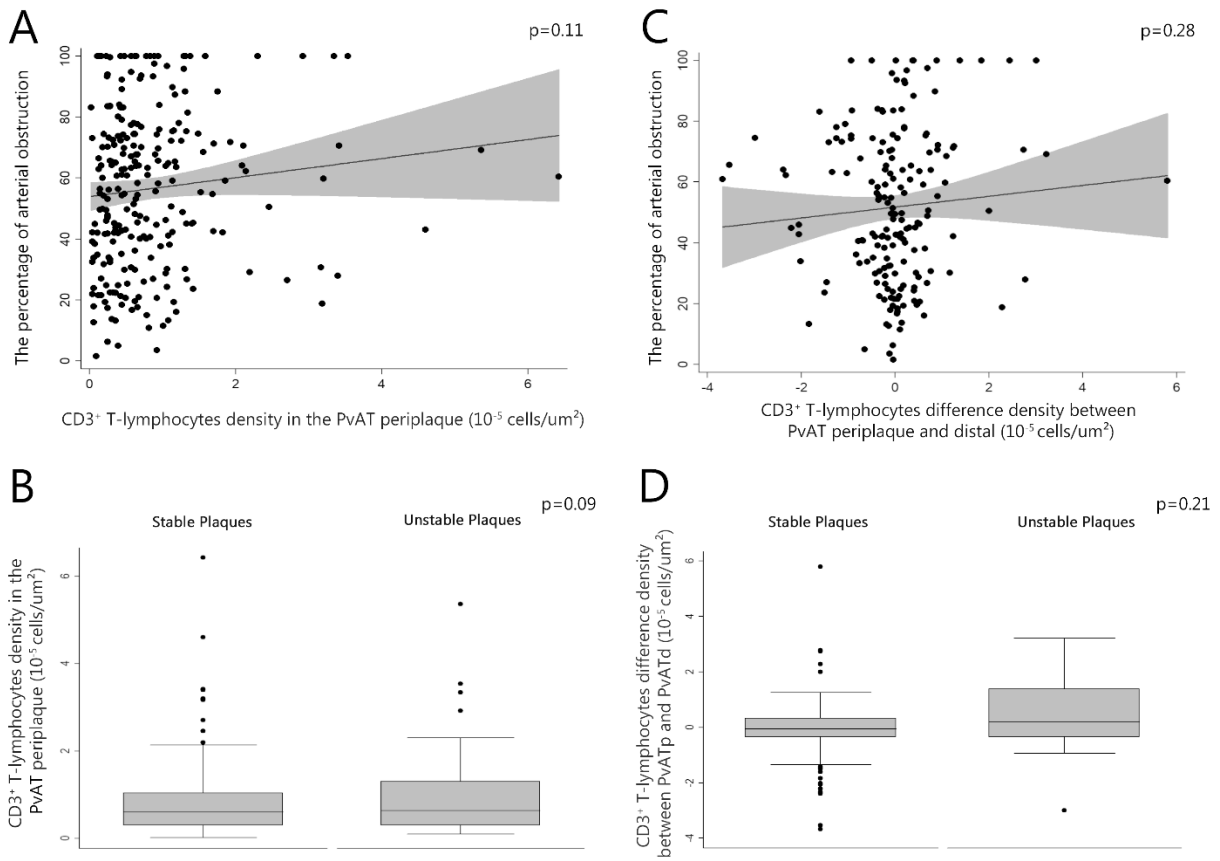

PvATp: periplaque perivascular adipose tissue; PvATd: distal perivascular adipose tissue. A: Scatter plot of the density of CD3<sup>+</sup> T-lymphocytes in periplaque PvAT with the percentage of coronary artery obstruction. B: Box plot graph of the density of CD3<sup>+</sup> T-lymphocytes in periplaque PvAT by stable and unstable plaque groups. C: Scatter plot of the difference of the CD3<sup>+</sup> T-lymphocytes density in periplaque PvAT and distal PvAT with the percentage of coronary artery obstruction. D: Box plot graph of the difference density of CD3<sup>+</sup> T-lymphocytes between periplaque PvAT and distal PvAT by stable and unstable plaque groups. PvATp: periplaque perivascular adipose tissue; PvATd: distal perivascular adipose tissue.
